# Supplementary material for: SHMT2 expression as a diagnostic and prognostic marker for thyroid cancer
Source: PubMed Central journal article supplement — Endocr Connect. 2021 May 19;10(6):630–6. doi: 10.1530/EC-21-0135 (PMC8240706; doi:10.1530/ec-21-0135), 2021-05-19
Supplement: supplementary_table_1.pdf [file supplementary_table_1.pdf]

**Supplementary Table1. Comparison of characteristics according to SHMT2 expression in patients with PTC**

|                                           | <b>SHMT2 negative<br/>(n=34)</b> | <b>SHMT2 positive<br/>(n=95)</b> | <b><i>P</i> value</b> |
|-------------------------------------------|----------------------------------|----------------------------------|-----------------------|
| <b>Sex</b>                                |                                  |                                  | 0.203                 |
| Male                                      | 9 (26.5%)                        | 14 (14.7%)                       |                       |
| Female                                    | 25 (73.5%)                       | 81 (85.3%)                       |                       |
| <b>Age, (years)</b>                       | 44.7 (29.6–51.5)                 | 50.6 (42.1–57.3)                 | <b>0.004</b>          |
| Age ≥ 55                                  | 5 (14.7%)                        | 30 (31.6%)                       | 0.094                 |
| <b>Thyroid surgery</b>                    |                                  |                                  | 0.384                 |
| Lobectomy                                 | 4 (11.8%)                        | 5 (5.3%)                         |                       |
| TT ± CND                                  | 17 (50.0%)                       | 56 (58.9%)                       |                       |
| TT + MRND                                 | 13 (38.2%)                       | 34 (35.8%)                       |                       |
| <b>Tumor size, (cm)</b>                   | 2.3 (1.6–3.0)                    | 2.2 (1.6–3.1)                    | 0.851                 |
| Tumor size <2cm                           | 16 (47.1%)                       | 45 (47.4%)                       | 0.791                 |
| 2cm<tumor size <4cm                       | 13 (38.2%)                       | 40 (42.1%)                       |                       |
| Tumor size > 4cm                          | 5 (14.7%)                        | 10 (10.5%)                       |                       |
| <b>Extrathyroid extension</b>             |                                  |                                  | 0.727                 |
| Microscopic                               | 11 (32.4%)                       | 29 (30.5%)                       |                       |
| Gross                                     | 14 (41.2%)                       | 46 (48.4%)                       |                       |
| <b>T stage (8<sup>th</sup> edition)</b>   |                                  |                                  | 0.693                 |
| T1                                        | 11 (32.4%)                       | 27 (28.4%)                       |                       |
| T2                                        | 7 (20.6%)                        | 19 (20.0%)                       |                       |
| T3                                        | 9 (26.5%)                        | 35 (36.8%)                       |                       |
| T4                                        | 7 (20.6%)                        | 14 (14.7%)                       |                       |
| <b>N stage (8<sup>th</sup> edition)</b>   |                                  |                                  | 0.157                 |
| No/Nx                                     | 6 (17.6%)                        | 15 (15.8%)                       |                       |
| N1a                                       | 5 (14.7%)                        | 5 (5.3%)                         |                       |
| N1b                                       | 13 (38.2%)                       | 33 (34.7%)                       |                       |
| <b>M stage (8<sup>th</sup> edition)</b>   |                                  |                                  | 0.108                 |
| M0                                        | 28 (82.4%)                       | 89 (93.7%)                       |                       |
| M1                                        | 6 (17.6%)                        | 6 (6.3%)                         |                       |
| <b>TNM stage (8<sup>th</sup> edition)</b> |                                  |                                  | 0.694                 |
| Stage I                                   | 27 (79.4%)                       | 70 (73.7%)                       |                       |

---

|           |           |            |
|-----------|-----------|------------|
| Stage II  | 4 (11.8%) | 18 (18.9%) |
| Stage III | 1 (2.9%)  | 4 (4.2%)   |
| Stage IV  | 2 (5.9%)  | 3 (3.2%)   |

---

Continuous variables were presented as median and interquartile range (IQR) and categorical variables were presented as number (percentage). *SHMT2* serine hydroxymethyltransferase2  
*PTC* papillary thyroid carcinoma; *TNM* tumor-node-metastasis
